# Supplementary material for: Preconcentration of Ag and Pd ions using graphite oxide and 2,6-diaminopyridyne from water, anode slime and catalytic converter samples
Source: Royal Society of Chemistry journal article supplement (doi:10.1039/c3ra48028c), 2014-01-01
Supplement: c3ra48028c1.pdf [file c3ra48028c1.pdf]

**Preconcentration of Ag and Pd ions by using graphite oxide and 2,6  
diaminopyridyne from water, anode slime and catalytic converter samples**

Gülşen Yıldırım, Şerife Tokaloğlu, Halil Şahan, Şaban Patat

*Erciyes University, Faculty of Science, Chemistry Department, TR-38039, Kayseri, Turkey*

\* Corresponding author. Tel.: +90 352 207 66 66; fax: +90 352 437 49 33.  
*E-mail address:* [serifet@erciyes.edu.tr](mailto:serifet@erciyes.edu.tr) (Ş. Tokaloğlu).

### *Synthesis of graphite oxide*

Firstly, natural graphite powders were treated by 5% HCl twice, then filtered, washed with distilled water thoroughly, and dried at 110 °C for 24 h. Graphite powder (10 g) was placed in cold (0°C) concentrated H<sub>2</sub>SO<sub>4</sub> (230 mL), KMnO<sub>4</sub> (30 g) was added gradually with stirring and cooling. The temperature of the solution was not allowed to go up to 20°C. The mixture was then stirred at 35 ± 3°C for 30 min, distilled water (460 mL) was slowly added to cause an increase in temperature to 98 °C. This temperature was held for 15 min. After this the reaction was terminated by addition of a large amount of ultra high purity water (1.4L) and 30% H<sub>2</sub>O<sub>2</sub> solution (100 mL). The mixture was filtered, washed with 5% HCl aqueous solution until sulfate could not be detected with BaCl<sub>2</sub>. The reaction product was dried under vacuum at 50 °C for 24h.

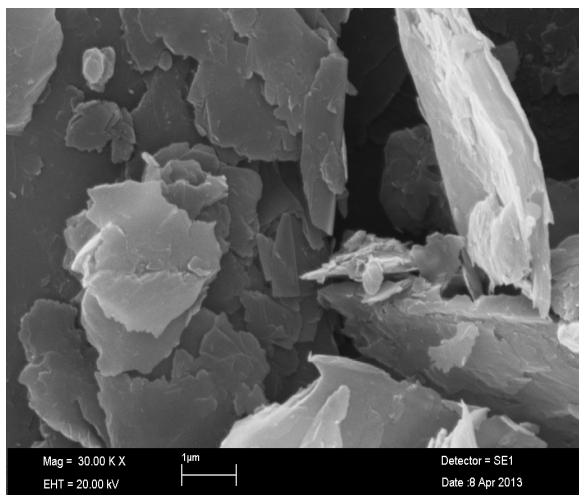

(a)

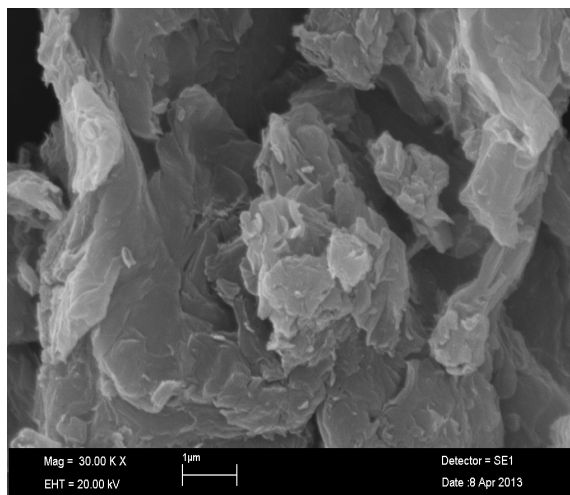

(b)

**Fig S1.** SEM images of graphite (a) and graphite oxide(b).
